# Supplementary material for: Low-dose naltrexone extends healthspan and lifespan in C. elegans via SKN-1 activation
Source: iScience. 2024 May 8;27(6):109949. doi: 10.1016/j.isci.2024.109949 (PMC11126937; doi:10.1016/j.isci.2024.109949)
Supplement: Table S2. C. elegans Metabolomics data, related to Figure 2 [file mmc2.xlsx]

## Sheet: Statistics
Analyte.name	HMDB.name	Chemical.formula	Monoisotopic.weight	HMDB.id	KEGG.id	Vehicle_01	Vehicle_02	Vehicle_03	Vehicle_04	Vehicle_05	Vehicle_06	2.5uM Naltrexone_01	2.5uM Naltrexone_02	2.5uM Naltrexone_03	2.5uM Naltrexone_04	2.5uM Naltrexone_05	2.5uM Naltrexone_06	P_Value	HOLM	BONFERRONI	FDR	VIP_score	Fold_change	Log2_fold_change
2-Aminobutyric acid	L-alpha-Aminobutyric acid	C4H9NO2	103.063	HMDB0000452	C02356	5.96e-05	0.0462015	1e-10	0.0132961	0.0256637	0.0077725	0.0349623	0.0651826	0.0596765	0.0274769	0.0380195	0.0145505	0.045577	1	1	0.290253	1.35373	2.57941	1.36704
2-Dehydrogluconate	2-Keto-L-gluconate	C6H10O7	194.043	HMDB0011732	C03342	0.26461	0.27138	0.394891	0.239159	0.289027	0.274182	0.318096	0.297809	0.263892	0.422773	0.325992	0.360124	0.207156	1	1	0.486296	0.917204	1.14737	0.198336
2-Hydroxybutyric acid	2-Hydroxybutyric acid	C4H8O3	104.047	HMDB0000008	C05984	0.029125	0.0386779	0.0297789	0.0337722	0.0369819	0.0129233	0.0244767	0.0203321	0.029734	0.0294703	0.021347	0.0284335	0.307174	1	1	0.620327	0.76377	0.848474	-0.237058
2-Hydroxyglutarate	D-2-Hydroxyglutaric acid	C5H8O5	148.037	HMDB0000606	C01087	0.223797	0.262697	0.28184	0.333865	0.26914	0.195122	0.231325	0.273459	0.258469	0.219207	0.225051	0.221043	0.323277	1	1	0.630913	0.753647	0.911963	-0.132953
2-Hydroxyglutarate	L-2-Hydroxyglutaric acid	C5H8O5	148.037	HMDB0000694	C03196	0.223797	0.262697	0.28184	0.333865	0.26914	0.195122	0.231325	0.273459	0.258469	0.219207	0.225051	0.221043	0.323277	1	1	0.630913	0.753647	0.911963	-0.132953
2-Hydroxyglutarate	2-Hydroxyglutarate	C5H8O5	148.037	HMDB0059655	C02630	0.223797	0.262697	0.28184	0.333865	0.26914	0.195122	0.231325	0.273459	0.258469	0.219207	0.225051	0.221043	0.323277	1	1	0.630913	0.753647	0.911963	-0.132953
2-phosphoglyceric acid	2-Phosphoglyceric acid	C3H7O7P	185.993	HMDB0000362		0.0151723	0.021728	0.0177072	0.0264512	0.0264393	0.0105756	0.0208273	0.0218849	0.0209334	0.00854619	0.0187654	0.0149147	0.555995	1	1	0.755903	0.560403	0.89666	-0.157367
3-_or_4-hydroxybenzoic acid	4-Hydroxybenzoic acid	C7H6O3	138.032	HMDB0000500	C00156	0.255747	0.339275	0.256759	0.402335	0.583366	0.207855	0.227463	0.716685	0.299828	0.238303	0.218374	0.208502	0.822742	1	1	0.926949	0.16654	0.933418	-0.0994046
3-_or_4-hydroxybenzoic acid	3-Hydroxybenzoic acid	C7H6O3	138.032	HMDB0002466	C00587	0.255747	0.339275	0.256759	0.402335	0.583366	0.207855	0.227463	0.716685	0.299828	0.238303	0.218374	0.208502	0.822742	1	1	0.926949	0.16654	0.933418	-0.0994046
3-Ureidopropionic acid	Ureidopropionic acid	C4H8N2O3	132.053	HMDB0000026	C02642	0.431703	0.508797	0.420465	0.474563	0.357955	0.426585	0.435363	0.552411	0.494764	0.319663	0.518933	0.486483	0.451755	1	1	0.692202	0.602476	1.07158	0.0997419
Acetylglutamic acid	N-Acetylglutamic acid	C7H11NO5	189.064	HMDB0001138	C00624	0.0227907	0.025178	0.0254691	0.0246631	0.0175372	0.018141	0.0177061	0.0226468	0.0211611	0.014485	0.0190808	0.016783	0.0844812	1	1	0.358701	1.18342	0.836175	-0.258123
Adenine	Adenine	C5H5N5	135.054	HMDB0000034	C00147	0.0443546	0.0474505	0.0536544	0.0511533	0.0490549	0.0393354	0.062171	0.073785	0.0592579	0.0457401	0.0612019	0.0633109	0.0133554	1	1	0.161601	1.62164	1.28233	0.358763
Adenosine	Adenosine	C10H13N5O4	267.097	HMDB0000050	C00212	0.00644467	0.00763493	0.00863527	0.00797304	0.00806033	0.00461629	0.00903979	0.0110696	0.00686213	0.00651647	0.00779935	0.00692456	0.406543	1	1	0.683218	0.61363	1.11178	0.152874
ADP	ADP	C10H15N5O10P2	427.029	HMDB0001341	C00008	1.34201	1.28383	1.25221	0.953736	0.790576	0.92034	0.933299	1.12886	1.0398	1.71471	1.14888	1.26132	0.452704	1	1	0.692202	0.596836	1.10457	0.143482
ADP-Ribose	Adenosine diphosphate ribose	C15H23N5O14P2	559.072	HMDB0001178	C00301	0.0048254	0.00441076	0.0021018	0.00254714	0.00242443	0.00202247	0.00238446	0.00559636	0.00219777	1e-10	0.00396015	0.00465231	0.938663	1	1	0.949227	0.0612626	1.02504	0.0356823
AICAR	AICAR	C9H15N4O8P	338.063	HMDB0001517	C04677	0.00159385	0.00236085	0.00241611	0.00213913	0.00150757	0.00133564	0.000591987	0.00206548	0.00123053	0.000465507	0.00136956	0.00127894	0.0397627	1	1	0.290253	1.36476	0.616746	-0.697253
Alanine	L-Alanine	C3H7NO2	89.0477	HMDB0000161	C00041	4.47612	5.72306	5.444	5.43985	4.73175	3.98933	4.88974	5.44722	5.03509	5.13277	5.08238	4.76669	0.763481	1	1	0.914665	0.295632	1.01845	0.0263702
Allantoin	Allantoin	C4H6N4O3	158.044	HMDB0000462	C01551	0.0890893	0.0659146	0.162492	0.0786362	0.0551968	0.0807524	0.0539327	0.0884158	0.0578296	0.290444	0.0559126	0.0918886	0.675813	1	1	0.843024	0.443745	1.19986	0.262865
Alpha-Ketoglutarate	Oxoglutaric acid	C5H6O5	146.022	HMDB0000208	C00026	0.069419	0.0849218	0.0742795	0.0969549	0.0868293	0.0630314	0.0712628	0.0836253	0.0803728	0.0697467	0.0716261	0.0672791	0.390537	1	1	0.665563	0.679187	0.933697	-0.0989741
Aminoadipic acid	Aminoadipic acid	C6H11NO4	161.069	HMDB0000510	C00956	0.079847	0.0838712	0.0840193	0.0769942	0.0653302	0.0545491	0.0856428	0.0991256	0.0944189	0.0931263	0.0813184	0.0786146	0.0340666	1	1	0.290253	1.41481	1.19711	0.259551
AMP	Adenosine monophosphate	C10H14N5O7P	347.063	HMDB0000045	C00020	0.240087	0.269685	0.245273	0.266311	0.263606	0.197241	0.264273	0.32291	0.251632	0.251523	0.272619	0.268302	0.139659	1	1	0.384062	1.03851	1.10056	0.138242
Anthranilic acid	2-Aminobenzoic acid	C7H7NO2	137.048	HMDB0001123	C00108	0.180896	0.181911	0.182143	0.148235	0.168915	0.13358	0.12325	0.17615	0.139771	0.101694	0.12362	0.14051	0.0377253	1	1	0.290253	1.37823	0.808486	-0.306705
Arginine	L-Arginine	C6H14N4O2	174.112	HMDB0000517	C00062	3.1346	3.63026	3.58053	3.15086	2.92816	2.52094	3.41574	3.95837	3.49975	3.53984	3.36132	3.6364	0.0654324	1	1	0.358701	1.28223	1.13017	0.176536
Asparagine	L-Asparagine	C4H8N2O3	132.053	HMDB0000168	C00152	14.0014	16.5387	15.5217	12.8095	12.6095	12.2944	12.0909	13.0883	12.5911	23.5295	13.0092	12.4763	0.805145	1	1	0.926949	0.297158	1.03593	0.050923
Aspartate	L-Aspartic acid	C4H7NO4	133.038	HMDB0000191	C00049	1.40299	1.54792	1.59501	1.73518	1.4403	1.25727	1.51856	1.8018	1.54448	1.53857	1.50313	1.60386	0.3076	1	1	0.620327	0.750336	1.05922	0.0830037
ATP	Adenosine triphosphate	C10H16N5O13P3	506.996	HMDB0000538	C00002	0.103371	0.120429	0.123763	0.113575	0.096485	0.0974396	0.0983822	0.10052	0.111295	0.126831	0.106951	0.10638	0.904202	1	1	0.949227	0.0906857	0.992822	-0.0103937
beta-Alanine	beta-Alanine	C3H7NO2	89.0477	HMDB0000056	C00099	3.09784	4.14324	4.06652	5.13767	4.10132	3.02968	4.65251	5.1627	4.44403	3.7176	4.04009	3.85007	0.352806	1	1	0.637157	0.743909	1.09716	0.133776
Betaine	Betaine	C5H11NO2	117.079	HMDB0000043	C00719	8.46798	14.478	12.8969	16.3109	9.26568	9.24137	7.85275	8.80876	9.26961	6.23504	9.35408	7.63279	0.0423237	1	1	0.290253	1.43204	0.695619	-0.52363
Carnitine	L-Carnitine	C7H15NO3	161.105	HMDB0000062	C00318	0.0391132	0.0580706	0.0512997	0.0619082	0.0442237	0.0395338	0.0371663	0.0478869	0.0433566	0.0368891	0.0432393	0.040428	0.123835	1	1	0.384062	1.11473	0.846394	-0.240599
Carnitine (C2:0)	L-Acetylcarnitine	C9H17NO4	203.116	HMDB0000201	C02571	0.00646197	0.0056304	0.00791455	0.0070387	0.00814948	0.00505953	0.00468471	0.00417774	0.00817278	0.00659595	0.00384005	0.00353818	0.121838	1	1	0.384062	1.08207	0.770332	-0.376449
Carnitine (C3:0)	Propionylcarnitine	C10H19NO4	217.131	HMDB0000824	C03017	0.00603168	0.00574391	0.00811496	0.00841764	0.00767445	0.00579723	0.00523838	0.00366289	0.00779443	0.00560893	0.00377193	0.00516371	0.0525738	1	1	0.318072	1.30469	0.747735	-0.419401
Carnitine (C5:0)	Valerylcarnitine	C12H24NO4	246.17	HMDB0013128		0.00579651	0.00640768	0.0121269	0.0127578	0.0101688	0.00603621	0.00714855	0.00538919	0.0106323	0.00115454	0.00474496	0.00660372	0.137928	1	1	0.384062	1.06128	0.669368	-0.579128
CDP	CDP	C9H15N3O11P2	403.018	HMDB0001546	C00112	0.0618432	0.0584716	0.052051	0.0390017	0.0351751	0.0239663	0.0306594	0.0515284	0.0349024	0.0663665	0.0420848	0.036245	0.861267	1	1	0.947393	0.253896	0.967756	-0.0472847
CDP-choline	Citicoline	C14H26N4O11P2	488.107	HMDB0001413	C00307	0.0343291	0.0393536	0.0215064	0.0259714	0.0211268	0.0148951	0.018837	0.0298187	0.0201743	0.0242877	0.0231846	0.0208161	0.437265	1	1	0.692202	0.574256	0.872353	-0.197017
CDP-ethanolamine	CDP-Ethanolamine	C11H20N4O11P2	446.06	HMDB0001564	C00570	0.0174379	0.0335241	0.0172969	0.0241865	0.0151728	0.0048815	0.0143035	0.0282662	0.0149111	1e-10	0.0192267	0.0142379	0.521375	1	1	0.732139	0.512551	0.808406	-0.306848
Choline	Choline	C5H14NO	104.108	HMDB0000097	C00114	1.15582	1.08053	1.64525	1.22717	1.22457	1.17796	1.15716	0.936852	1.19699	0.798292	1.15476	1.16811	0.113619	1	1	0.384062	1.0984	0.85367	-0.22825
Citric acid	Citric acid	C6H8O7	192.027	HMDB0000094	C00158	0.929558	0.946928	1.64556	1.01954	0.968926	1.22366	0.944128	0.856201	1.25902	1.10208	0.971741	1.49691	0.909863	1	1	0.949227	0.119515	0.984543	-0.0224742
Citrulline	Citrulline	C6H13N3O3	175.096	HMDB0000904	C00327	0.103986	0.116952	0.150601	0.0769313	0.0878417	0.0966778	0.0984047	0.0877478	0.115446	0.112105	0.106895	0.114764	0.973582	1	1	0.973582	0.0783814	1.00375	0.00539547
CMP	Cytidine monophosphate	C9H14N3O8P	323.052	HMDB0000095	C00055	0.111754	0.180073	0.156939	0.23714	0.243402	0.111891	0.190914	0.189165	0.181701	0.0349444	0.163505	0.124455	0.463375	1	1	0.692202	0.636618	0.849678	-0.235012
Cystathionine	L-Cystathionine	C7H14N2O4S	222.067	HMDB0000099	C02291	2.75841	3.25686	3.03714	3.00392	2.28025	2.39628	2.41256	2.63211	2.67324	2.83865	2.53596	2.39372	0.266085	1	1	0.574934	0.811958	0.925499	-0.111697
Cysteine	L-Cysteine	C3H7NO2S	121.02	HMDB0000574	C00097	0.3123	0.382727	0.33497	0.345244	0.278972	0.256998	0.277851	0.333833	0.28322	0.222609	0.296227	0.282467	0.164081	1	1	0.42242	0.987478	0.887505	-0.172174
Cystine	L-Cystine	C6H12N2O4S2	240.024	HMDB0000192	C00491	0.0355924	0.0439465	0.049077	0.01952	0.0209983	0.0305073	0.036132	0.105715	0.0246484	0.0194023	0.0984715	0.0887328	0.138445	1	1	0.384062	1.08129	1.86886	0.902159
Cytidine	Cytidine	C9H13N3O5	243.086	HMDB0000089	C02961	0.0484108	0.0555254	0.0474387	0.0406179	0.0401434	0.0280167	0.0418424	0.0471216	0.0349004	0.0395084	0.0391568	0.0325356	0.368841	1	1	0.647442	0.655976	0.903565	-0.146299
dAMP	Deoxyadenosine monophosphate	C10H14N5O6P	331.068	HMDB0000905	C00360	0.00740575	0.0065664	0.00666131	0.00631157	0.00615436	0.0035892	0.00485988	0.00545361	0.00451903	0.00429473	0.00489262	0.00467917	0.0552596	1	1	0.318401	1.36617	0.782234	-0.354329
dCMP	dCMP	C9H14N3O7P	307.057	HMDB0001202	C00239	0.0863183	0.132802	0.0749606	0.120172	0.129277	0.0550657	0.0833072	0.0898929	0.0760109	0.0162654	0.074323	0.0510552	0.0729663	1	1	0.358701	1.24004	0.652952	-0.614951
Dihydroxyacetone-P	Dihydroxyacetone phosphate	C3H7O6P	169.998	HMDB0001473	C00111	0.0313187	0.0376304	0.0377261	0.0802826	0.088702	0.0404019	0.0508906	0.0512228	0.0483669	0.0322998	0.0445831	0.0445081	0.5136	1	1	0.731125	0.534349	0.860184	-0.217282
dUMP	dUMP	C9H13N2O8P	308.041	HMDB0001409	C00365	0.00558941	0.00742514	0.00401294	0.00600495	0.00679796	0.0046454	0.00774974	0.00745683	0.00517308	0.0013454	0.00570181	0.00537477	0.801521	1	1	0.926949	0.312721	0.951439	-0.0718167
FAD	FAD	C27H33N9O15P2	785.157	HMDB0001248	C00016	0.0282401	0.0347659	0.0243006	0.0235729	0.0236828	0.0177214	0.0285865	0.0416553	0.023817	0.0526711	0.0319473	0.0329514	0.0754813	1	1	0.358701	1.24526	1.3897	0.474773
FAICAR	Phosphoribosyl formamidocarboxamide	C10H15N4O9P	366.058	HMDB0001439	C04734	0.00649948	0.00579351	0.00567577	0.00405868	0.00430597	0.00571058	0.0042227	0.00489188	0.00412394	0.00537149	0.00536962	0.00528647	0.336067	1	1	0.635377	0.788492	0.91331	-0.130823
Fructose-1,6-diphosphate	Fructose 1,6-bisphosphate	C6H14O12P2	339.996	HMDB0001058	C00354	0.0703469	0.0537503	0.0897977	0.080038	0.0473297	0.0515533	0.0564412	0.0760034	0.085085	0.0431219	0.0661665	0.0618034	0.941382	1	1	0.949227	0.179539	0.989322	-0.0154877
Fumarate	Fumaric acid	C4H4O4	116.011	HMDB0000134	C00122	0.301999	0.284684	0.245879	0.170893	0.192469	0.136897	0.180528	0.407781	0.175677	0.131961	0.387019	0.41624	0.346744	1	1	0.635697	0.688245	1.2749	0.35038
GDP	Guanosine diphosphate	C10H15N5O11P2	443.024	HMDB0001201	C00035	0.456862	0.505878	0.287223	0.34673	0.357806	0.208743	0.295661	0.433228	0.263574	0.358949	0.3782	0.29886	0.673125	1	1	0.843024	0.312976	0.9377	-0.0928019
Gluconate	Gluconic acid	C6H12O7	196.058	HMDB0000625	C00257	1.94837	2.57581	1.47485	2.78582	1.98641	1.51752	2.26245	2.25254	2.1567	1.68163	2.22347	1.95244	0.871617	1	1	0.949227	0.404561	1.01957	0.0279586
Gluconate-6P	6-Phosphogluconic acid	C6H13O10P	276.025	HMDB0001316	C00345	0.0436806	0.0660066	0.0431173	0.0674176	0.0863367	0.0356212	0.0660333	0.0591637	0.0544871	0.0252383	0.0555937	0.0463438	0.563087	1	1	0.757039	0.531377	0.896779	-0.157175
Glucose	D-Glucose	C6H12O6	180.063	HMDB0000122	C00031	1.15061	1.04602	1.35197	1.02372	1.02283	0.969234	0.971592	1.20516	0.900246	0.959971	1.14355	1.19079	0.691514	1	1	0.853808	0.345969	0.970589	-0.0430672
Glucose-6P	Glucose 6-phosphate	C6H13O9P	260.03	HMDB0001401	C00092	0.864507	1.03764	0.970242	1.3043	1.25637	0.870948	1.30133	1.5966	1.37061	0.782141	1.22755	1.19141	0.181608	1	1	0.449004	0.999898	1.1849	0.244769
Glutamate	L-Glutamic acid	C5H9NO4	147.053	HMDB0000148	C00025	3.17181	3.79829	3.56029	3.54451	2.97836	2.64833	2.79608	3.28855	2.89662	3.10998	2.7932	2.85922	0.13437	1	1	0.384062	1.07051	0.90062	-0.15101
Glutamine	L-Glutamine	C5H10N2O3	146.069	HMDB0000641	C00064	15.3941	19.0004	17.7109	17.0024	13.9247	12.6923	12.4486	13.9349	13.3507	13.3761	12.2654	11.6476	0.02253	1	1	0.227178	1.56521	0.804633	-0.313598
Glutathione	Glutathione	C10H17N3O6S	307.084	HMDB0000125	C02471	1.64654	1.87941	3.86071	2.11309	1.84346	2.09896	1.83344	1.29958	2.77347	2.08087	1.44569	1.5517	0.331675	1	1	0.635377	0.702002	0.817186	-0.291264
Glycerate	Glyceric acid	C3H6O4	106.027	HMDB0000139	C00258	0.291879	0.315477	0.260761	0.32998	0.457345	0.217566	0.237444	0.297927	0.233499	0.211434	0.256903	0.233841	0.105774	1	1	0.384062	1.16499	0.785394	-0.348512
Glycerol-3P	Glycerol 3-phosphate	C3H9O6P	172.014	HMDB0000126	C00093	1.79557	2.50403	2.0991	2.91524	2.75603	1.43472	2.38795	2.32028	2.33755	1.3293	1.92575	1.7058	0.414906	1	1	0.687721	0.687569	0.889071	-0.169629
Glycerophosphocholine	Glycerophosphocholine	C8H20NO6P	257.103	HMDB0000086	C00670	11.3432	5.02292	8.58082	4.66605	6.67211	4.73388	6.84695	6.77695	9.29778	4.68417	3.44684	5.96251	0.636811	1	1	0.828539	0.350478	0.902392	-0.148174
Glycerophosphoinositol	1-(sn-Glycero-3-phospho)-1D-myo-inositol	C9H19O11P	334.066	HMDB0011649	C01225	0.0795119	0.080009	0.0846499	0.0719787	0.0652235	0.0637227	0.0853814	0.0965598	0.0822335	0.055348	0.0847063	0.101345	0.213006	1	1	0.486296	0.908146	1.13588	0.183806
GMP	Guanosine monophosphate	C10H14N5O8P	363.058	HMDB0001397	C00144	0.132903	0.167545	0.144815	0.169242	0.161939	0.109662	0.139198	0.172731	0.145963	0.131814	0.150862	0.13992	0.935273	1	1	0.949227	0.249337	0.993659	-0.00917742
GTP	Guanosine triphosphate	C10H16N5O14P3	522.991	HMDB0001273	C00044	0.0333444	0.0451497	0.0413736	0.0427128	0.0363287	0.0354235	0.0398504	0.0389385	0.0468813	0.0203966	0.0436379	0.0398487	0.855728	1	1	0.947393	0.426401	0.979605	-0.029728
Guanine	Guanine	C5H5N5O	151.049	HMDB0000132	C00242	0.00686043	0.00771676	0.00544053	0.00490908	0.00457567	0.0260239	0.00411867	0.00612116	0.00386122	0.0130065	0.00508677	0.00698455	0.482258	1	1	0.708972	0.618826	0.70559	-0.503098
Guanosine	Guanosine	C10H13N5O5	283.092	HMDB0000133	C00387	0.0737467	0.077836	0.0751811	0.0688247	0.0695644	0.0492936	0.077034	0.0991201	0.0801987	0.0633393	0.0742955	0.074875	0.185539	1	1	0.449004	0.944885	1.1313	0.177979
Hexose-P	Galactose 1-phosphate	C6H13O9P	260.03	HMDB0000645	C00446	0.344802	0.391398	0.443516	0.50182	0.45093	0.355685	0.484624	0.613483	0.516965	0.568989	0.435025	0.455754	0.0262195	1	1	0.244043	1.44791	1.23579	0.305438
Hexose-P	Mannose 6-phosphate	C6H13O9P	260.03	HMDB0001078	C00275	0.344802	0.391398	0.443516	0.50182	0.45093	0.355685	0.484624	0.613483	0.516965	0.568989	0.435025	0.455754	0.0262195	1	1	0.244043	1.44791	1.23579	0.305438
Hexose-P	Glucose 1-phosphate	C6H13O9P	260.03	HMDB0001586	C00103	0.344802	0.391398	0.443516	0.50182	0.45093	0.355685	0.484624	0.613483	0.516965	0.568989	0.435025	0.455754	0.0262195	1	1	0.244043	1.44791	1.23579	0.305438
Hexose-P	D-Mannose 1-phosphate	C6H13O9P	260.03	HMDB0006330	C00636	0.344802	0.391398	0.443516	0.50182	0.45093	0.355685	0.484624	0.613483	0.516965	0.568989	0.435025	0.455754	0.0262195	1	1	0.244043	1.44791	1.23579	0.305438
Homocysteine	Homocysteine	C4H9NO2S	135.035	HMDB0000742	C05330	0.401919	0.51662	0.45171	0.511533	0.390201	0.352545	0.38404	0.412665	0.413774	0.26702	0.398428	0.340286	0.0888573	1	1	0.358701	1.19336	0.844424	-0.24396
Homocystine	DL-Homocystine	C8H16N2O4S2	268.055	HMDB0000575	C01817	0.208379	0.183174	0.191847	0.100645	0.0958848	0.207426	0.133534	0.15119	0.145046	0.253132	0.193511	0.223786	0.531441	1	1	0.732139	0.559387	1.11429	0.156121
Homocystine	L-Homocystine	C8H16N2O4S2	268.055	HMDB0000676	C01817	0.208379	0.183174	0.191847	0.100645	0.0958848	0.207426	0.133534	0.15119	0.145046	0.253132	0.193511	0.223786	0.531441	1	1	0.732139	0.559387	1.11429	0.156121
Hypoxanthine	Hypoxanthine	C5H4N4O	136.039	HMDB0000157	C00262	0.0567916	0.0725698	0.0674646	0.099279	0.111382	0.0510214	0.0779379	0.118685	0.0828661	0.0592891	0.077026	0.0656486	0.773741	1	1	0.917869	0.287248	1.05004	0.0704481
IMP	Inosinic acid	C10H13N4O8P	348.047	HMDB0000175	C00130	0.0250469	0.0338447	0.0322339	0.0277245	0.0523408	0.0247834	0.0526365	0.063832	0.0481994	0.00912601	0.0503963	0.0478248	0.185058	1	1	0.449004	0.981385	1.38801	0.473022
Inosine	Inosine	C10H12N4O5	268.081	HMDB0000195	C00294	1.02722	0.906261	1.18904	0.78778	0.529281	0.852385	0.987785	1.17997	0.984831	1.30853	0.817357	1.09901	0.149113	1	1	0.400948	1.03532	1.20513	0.269183
Isoleucine	L-Isoleucine	C6H13NO2	131.095	HMDB0000172	C00407	1.44357	1.57858	1.743	1.64106	1.48134	1.25863	3.14386	3.61447	3.49453	3.38115	3.33992	3.24667	3.72168e-09	4.50324e-07	4.50324e-07	4.50324e-07	2.24488	2.21082	1.14458
Kynurenine	L-Kynurenine	C10H12N2O3	208.085	HMDB0000684	C00328	3.12337	2.80565	3.70295	2.20579	1.98605	4.13673	2.34468	1.53136	2.55554	0.913561	2.75659	3.29958	0.153486	1	1	0.403735	0.998013	0.746154	-0.422455
Lactate	L-Lactic acid	C3H6O3	90.0317	HMDB0000190	C00256	1.17881	1.34352	1.14811	1.27312	1.38767	1.0828	0.892425	1.14635	1.02274	3.00878	0.883566	0.967676	0.814879	1	1	0.926949	0.299149	1.06845	0.0955225
Leucine	L-Leucine	C6H13NO2	131.095	HMDB0000687	C00123	1.45688	1.54704	1.60544	1.55583	1.46157	1.23938	2.45368	3.07055	2.74404	2.67496	2.68486	2.68013	7.00576e-07	8.33686e-05	8.47697e-05	2.82566e-05	2.20797	1.83938	0.879219
Lysine	L-Lysine	C6H14N2O2	146.106	HMDB0000182	C00047	5.02862	5.23168	5.46606	4.60093	4.63674	4.14136	5.87669	6.63494	6.02556	6.11777	6.41501	6.11743	0.000357166	0.0414313	0.0432171	0.00720285	2.00595	1.27768	0.353528
Malate	L-Malic acid	C4H6O5	134.022	HMDB0000156	C00149	0.224992	0.238993	0.28237	0.173319	0.232377	0.18434	0.179326	0.207796	0.190429	0.167749	0.212381	0.232674	0.231883	1	1	0.510143	0.864697	0.890723	-0.166952
Maleic acid	Maleic acid	C4H4O4	116.011	HMDB0000176	C01384	0.0356601	0.0322462	0.0241083	0.00681397	0.0149885	0.0125564	0.0133341	0.0568573	0.0133225	0.00758596	0.0461116	0.0512645	0.343196	1	1	0.635697	0.695767	1.49142	0.576687
Methionine	L-Methionine	C5H11NO2S	149.051	HMDB0000696	C00073	0.537409	0.559145	0.552302	0.49402	0.478342	0.43676	0.74089	0.90191	0.78212	0.798159	0.813099	0.822448	1.42601e-06	0.000168269	0.000172547	4.31368e-05	2.17152	1.58884	0.66797
Methyl-NAM	2-Aminobenzamide	C7H8N2O	136.064	HMDB0033947	C17512	0.0944589	0.172931	0.0740936	0.713297	0.213984	0.122075	0.100247	0.117282	0.0870114	0.263256	0.249543	0.130023	0.502043	1	1	0.723181	0.525485	0.681145	-0.553966
Methylmalonylcarnitine	Methylmalonylcarnitine	C11H19NO6	261.121	HMDB0013133		0.0847168	0.106085	0.0764528	0.100457	0.0869892	0.0568772	0.0672715	0.087777	0.0839796	0.0840912	0.0940154	0.07071	0.647267	1	1	0.833184	0.396276	0.953607	-0.0685332
N-alpha-Acetyl-Lysine	N-Alpha-acetyllysine	C8H16N2O3	188.116	HMDB0000446	C12989	0.342665	0.493067	0.302308	0.416626	0.444111	0.321785	0.401347	0.391829	0.353259	0.243905	0.369405	0.341778	0.369203	1	1	0.647442	0.70867	0.905609	-0.143039
NAD+	NAD	C21H28N7O14P2	664.117	HMDB0000902	C00003	0.0241585	0.0317231	0.0216685	0.0233672	0.0264076	0.0179172	0.027241	0.04032	0.0206918	0.0552926	0.031932	0.0330133	0.0878298	1	1	0.358701	1.22922	1.43547	0.521524
NADH	NADH	C21H29N7O14P2	665.125	HMDB0001487	C00004	0.00729317	0.00814137	0.0056228	0.0064102	0.00664119	0.00562546	0.00718772	0.00866883	0.00616627	0.0106804	0.00634834	0.00877233	0.135764	1	1	0.384062	1.07225	1.20359	0.267349
NADP+	NADP	C21H29N7O17P3	744.083	HMDB0000217	C00006	0.00509751	0.0059024	0.0047793	0.00481792	0.00526472	0.00368298	0.00378533	0.00838653	0.00435723	0.00945791	0.00634428	0.00708038	0.134755	1	1	0.384062	1.10643	1.33396	0.415717
Nicotinic acid	Nicotinic acid	C6H5NO2	123.032	HMDB0001488	C00253	0.233245	0.275031	0.239616	0.331133	0.267436	0.171441	0.227112	0.280266	0.212417	0.14105	0.225741	0.202822	0.210072	1	1	0.486296	0.914805	0.849467	-0.23537
Ophthalmic acid	Ophthalmic acid	C11H19N3O6	289.127	HMDB0005765	C21016	0.10655	0.141553	0.127818	0.129182	0.102178	0.0934214	0.17407	0.168938	0.191107	0.124763	0.144629	0.13794	0.0115837	1	1	0.155736	1.63946	1.34358	0.426078
Ornithine	Ornithine	C5H12N2O2	132.09	HMDB0000214	C00077	0.102324	0.416606	0.176886	0.967937	0.445115	0.243373	0.279559	0.419817	0.22038	0.102478	0.463881	0.216603	0.462274	1	1	0.692202	0.60592	0.723871	-0.466195
Orotic acid	Orotic acid	C5H4N2O4	156.017	HMDB0000226	C00295	0.00179653	0.00716103	1e-10	0.00343454	0.00292453	0.00215026	0.00517629	0.00663416	0.00333346	1e-10	0.00308266	1e-10	0.93301	1	1	0.949227	0.234136	1.04349	0.0614206
Oxiglutathione	Oxidized glutathione	C20H32N6O12S2	612.152	HMDB0003337	C00127	0.444495	0.50271	0.60947	0.535986	0.306514	0.443671	0.422017	0.478804	0.460693	0.274466	0.425614	0.444228	0.304122	1	1	0.620327	0.746728	0.881448	-0.182053
Pantothenic acid	Pantothenic acid	C9H17NO5	219.111	HMDB0000210	C00864	0.0120945	0.0324442	0.0204475	0.0312117	0.0206002	0.00976952	0.0208062	0.0233047	0.0195619	0.00657732	0.0113765	0.00750286	0.228737	1	1	0.510143	0.895049	0.704203	-0.505936
Phenylalanine	L-Phenylalanine	C9H11NO2	165.079	HMDB0000159	C00079	1.06925	1.26634	1.19415	1.41928	1.19309	0.927192	1.49013	1.71995	1.5895	1.48338	1.52672	1.53838	0.00140462	0.161531	0.169959	0.0242798	1.92559	1.32235	0.403099
Phosphoenolpyruvate	Phosphoenolpyruvic acid	C3H5O6P	167.982	HMDB0000263	C00074	0.236242	0.38318	0.27571	0.560813	0.639538	0.209121	0.387324	0.344135	0.353787	0.24453	0.296074	0.240163	0.379917	1	1	0.656713	0.702383	0.809689	-0.30456
Phosphorylethanolamine	O-Phosphoethanolamine	C2H8NO4P	141.019	HMDB0000224	C00346	0.235616	0.36301	0.292584	0.441382	0.389643	0.191664	0.268633	0.248067	0.282201	0.179479	0.222094	0.176498	0.0761317	1	1	0.358701	1.27264	0.719458	-0.475017
Phosphoserine	Phosphoserine	C3H8NO6P	185.009	HMDB0000272	C01005	0.0128541	0.0146879	0.012279	0.0105552	0.00725654	0.0101035	0.00922969	0.0104132	0.0091259	0.00785756	0.0103254	0.00886499	0.124295	1	1	0.384062	1.10945	0.82403	-0.279232
Proline	L-Proline	C5H9NO2	115.063	HMDB0000162	C00148	1.41454	1.68092	1.67587	1.68383	1.46062	1.21296	1.291	1.46026	1.29749	1.28772	1.26592	1.25652	0.0433375	1	1	0.290253	1.41008	0.860898	-0.216086
Pyroglutamic acid	Pyroglutamic acid	C5H7NO3	129.043	HMDB0000267	C01879	0.424556	0.509087	0.447433	1.40061	0.668473	0.365388	0.471779	0.506509	0.465521	0.329314	0.543296	0.420094	0.313017	1	1	0.620903	0.792998	0.717202	-0.479549
Pyruvate	Pyruvic acid	C3H4O3	88.016	HMDB0000243	C00022	0.423763	0.500284	0.421822	0.506918	0.496133	0.348783	0.358046	0.439928	0.398924	0.742047	0.451764	0.40822	0.794198	1	1	0.926949	0.234127	1.03752	0.053144
Ribose-5P	D-Ribose 5-phosphate	C5H11O8P	230.019	HMDB0001548	C00117	0.0729531	0.114202	0.0966712	0.187427	0.215993	0.0869814	0.148724	0.161461	0.154289	0.11954	0.130229	0.114425	0.730895	1	1	0.884383	0.380609	1.07032	0.098036
S-adenosyl homocysteine	S-Adenosylhomocysteine	C14H20N6O5S	384.122	HMDB0000939	C00021	0.0122289	0.00657001	0.00983579	0.00539673	0.00991606	0.00482102	0.0128893	0.01386	0.0179808	0.00940202	0.00657843	0.0111092	0.086674	1	1	0.358701	1.18172	1.47267	0.558431
Saccharopine	Saccharopine	C11H20N2O6	276.132	HMDB0000279	C00449	0.101383	0.148265	0.111042	0.121121	0.0968928	0.104993	0.0788077	0.138408	0.077844	0.188475	0.146224	0.128689	0.532465	1	1	0.732139	0.502829	1.10933	0.149695
Sedoheptulose-7P	D-Sedoheptulose 7-phosphate	C7H15O10P	290.04	HMDB0001068	C00281	0.202012	0.231879	0.246628	0.279454	0.241824	0.179621	0.286424	0.310855	0.320028	0.281421	0.254348	0.252469	0.0154189	1	1	0.169608	1.57392	1.23463	0.304084
Serine	L-Serine	C3H7NO3	105.043	HMDB0000187	C00065	7.42168	8.94688	8.32053	9.18434	7.01845	6.11729	6.51524	7.12278	6.99949	7.24079	6.69264	6.23064	0.088934	1	1	0.358701	1.22757	0.867949	-0.204317
Succinate	Succinic acid	C4H6O4	118.027	HMDB0000254	C00042	0.269299	0.316227	0.242906	0.365344	0.480884	0.287557	0.217385	0.308313	0.259758	0.410042	0.238189	0.21456	0.288162	1	1	0.611713	0.768716	0.839991	-0.251553
Succinyl_AMP	Adenylsuccinic acid	C14H18N5O11P	463.074	HMDB0000536	C03794	0.000519411	0.0004928	0.000399764	0.000611798	0.000844921	0.000142324	0.000658901	0.000734383	0.000545841	1e-10	0.000816317	0.000390465	0.886934	1	1	0.949227	0.336128	1.0448	0.0632247
Taurine	Taurine	C2H7NO3S	125.015	HMDB0000251	C00245	0.0192599	0.026312	0.0192587	0.0221916	0.0229029	0.0158948	0.0173325	0.0174739	0.0173563	0.00959811	0.0206406	0.0200723	0.105581	1	1	0.384062	1.13832	0.814448	-0.296106
Thiamine monophosphate	Thiamine monophosphate	C12H17N4O4PS	344.071	HMDB0002666	C01081	0.0355228	0.028874	0.0349184	0.0187543	0.00570306	0.0165109	0.020603	0.030596	0.0153254	0.0184392	0.01553	0.0252548	0.66581	1	1	0.843024	0.378436	0.896388	-0.157804
Threonine	L-Threonine	C4H9NO3	119.058	HMDB0000167	C00188	4.22787	4.76299	4.9518	4.74019	3.91795	3.96577	4.26258	4.49633	4.72191	3.91531	4.64767	4.64169	0.930663	1	1	0.949227	0.281906	1.00448	0.00644349
Thymine	Thymine	C5H6N2O2	126.043	HMDB0000262	C00178	0.00178918	0.00218602	0.00223807	0.00408811	0.00457477	0.00229853	0.00245806	0.00352169	0.0027201	0.00206793	0.00213997	0.00192944	0.48632	1	1	0.708972	0.529536	0.863899	-0.211066
Tryptophan	Tryptophan	C11H12N2O2	204.09	HMDB0030396	C00806	0.537528	0.624194	0.644344	0.685537	0.542549	0.460386	0.699654	0.833444	0.793142	0.733938	0.708288	0.718914	0.00303091	0.345524	0.36674	0.0458426	1.81074	1.28411	0.360772
Tyrosine	L-Tyrosine	C9H11NO3	181.074	HMDB0000158	C00082	1.04906	1.06618	1.18925	1.29577	1.03551	0.893339	1.52997	1.77282	1.59867	1.5573	1.56225	1.62329	4.05687e-05	0.00474654	0.00490882	0.000981763	2.11004	1.47712	0.562789
UDP	Uridine 5'-diphosphate	C9H14N2O12P2	404.002	HMDB0000295	C00015	0.156352	0.18169	0.15111	0.106098	0.0794059	0.0820627	0.0882851	0.141604	0.0983558	0.145885	0.108833	0.102765	0.570625	1	1	0.758743	0.454194	0.906188	-0.142117
UDP-HexNac	Uridine diphosphate-N-acetylglucosamine	C17H27N3O17P2	607.082	HMDB0000290	C00043	0.241401	0.322512	0.167053	0.200374	0.173123	0.0984606	0.134798	0.238859	0.119742	0.244608	0.160965	0.125712	0.46195	1	1	0.692202	0.546845	0.851828	-0.231367
UDP-HexNac	UDP-N-acetyl-D-mannosamine	C17H27N3O17P2	607.082	HMDB0013112	C01170	0.241401	0.322512	0.167053	0.200374	0.173123	0.0984606	0.134798	0.238859	0.119742	0.244608	0.160965	0.125712	0.46195	1	1	0.692202	0.546845	0.851828	-0.231367
UDP-HexNac	UDP-N-acetyl-alpha-D-galactosamine	C17H27N3O17P2	607.082	HMDB0060522	C00203	0.241401	0.322512	0.167053	0.200374	0.173123	0.0984606	0.134798	0.238859	0.119742	0.244608	0.160965	0.125712	0.46195	1	1	0.692202	0.546845	0.851828	-0.231367
UDP-hexose	Uridine diphosphate glucose	C15H24N2O17P2	566.055	HMDB0000286	C00029	0.153734	0.182253	0.116139	0.117265	0.104121	0.0736781	0.0959733	0.154158	0.0886372	0.204596	0.108779	0.110291	0.917427	1	1	0.949227	0.220865	1.0204	0.0291403
UDP-hexose	Uridine diphosphategalactose	C15H24N2O17P2	566.055	HMDB0000302	C00052	0.153734	0.182253	0.116139	0.117265	0.104121	0.0736781	0.0959733	0.154158	0.0886372	0.204596	0.108779	0.110291	0.917427	1	1	0.949227	0.220865	1.0204	0.0291403
UMP	Uridine 5'-monophosphate	C9H13N2O9P	324.036	HMDB0000288	C00105	0.333013	0.561335	0.317679	0.480934	0.584498	0.364877	0.421382	0.441541	0.447169	0.128593	0.483231	0.375556	0.44004	1	1	0.692202	0.649452	0.869486	-0.201765
Uracil	Uracil	C4H4N2O2	112.027	HMDB0000300	C00106	0.125749	0.138181	0.18024	0.170994	0.186906	0.159926	0.176137	0.193849	0.176672	0.119919	0.178592	0.189901	0.427325	1	1	0.692202	0.610877	1.07596	0.105624
Uric acid	Uric acid	C5H4N4O3	168.028	HMDB0000289	C00366	0.354631	0.533686	0.319605	0.680071	0.513217	0.360739	0.415091	0.586045	0.517407	0.24033	0.445389	0.331802	0.632942	1	1	0.828539	0.475023	0.918215	-0.123096
Uridine	Uridine	C9H12N2O6	244.07	HMDB0000296	C00299	0.113601	0.0825197	0.111664	0.0565078	0.0707191	0.0732789	0.114881	0.107529	0.0846675	0.102094	0.0952179	0.117024	0.118374	1	1	0.384062	1.11584	1.22256	0.289901
UTP	Uridine triphosphate	C9H15N2O15P3	483.969	HMDB0000285	C00075	0.215256	0.30136	0.0492955	0.452027	0.317432	0.115287	0.293196	0.381172	0.233477	0.0254365	0.249341	0.163741	0.82736	1	1	0.926949	0.344852	0.928106	-0.107639
Valine	L-Valine	C5H11NO2	117.079	HMDB0000883	C00183	1.84273	2.06803	2.18994	2.13219	1.97002	1.64257	3.46123	3.89433	3.73647	3.66586	3.44769	3.48363	4.82473e-08	5.78967e-06	5.83792e-06	2.91896e-06	2.2257	1.83101	0.87264
Xanthine	Xanthine	C5H4N4O2	152.033	HMDB0000292	C00385	1.48385	2.02543	1.53985	2.61039	2.21258	1.21196	1.73609	2.37584	2.00214	1.07572	1.82284	1.43556	0.715421	1	1	0.874404	0.415981	0.942633	-0.0852322
